# Supplementary material
Source: publisher figshare collection journal article supplement (https://frontiersin.figshare.com/ndownloader/files/23766407)
Supplement: Supplementary file 1 [file 23766407]

## Sheet: Sheet1
Sample	SRA Sample Title	Isolation Source	Collection Date	Depth (cm)	Sample Mass (mg)	DNA Concentration (ng/ml)	DNA Fraction (ng DNA/g sediment)	Mean Merged Read Length (bp)	SD Merged Read Length (bp)	3´ GàA	5´ CàT	Read Pairs	Unique Merged Reads	MEGAN nt Assigned Reads	MEGAN nt Assigned (%)	MEGAN nt Eukaryota Reads	MEGAN nt Eukaryota (%)	MEGAN nt Bacteria Reads	MEGAN nt Bacteria (%)	MEGAN nt Archaea Reads	MEGAN nt Archaea (%)	MEGAN nt Viridiplantae Reads	MEGAN nt Viridiplantae (%)	MEGAN nt Metazoa Reads	MEGAN nt Metazoa (%)	MEGAN nt Rhizobiales Reads	MEGAN nt Rhizobiales (%)	MEGAN nt Burkholderiales Reads	MEGAN nt Burkholderiales Reads (%)	MEGAN nt Methanobacteriales Reads	MEGAN nt Methanobacteriales (%)	MEGAN nt Methanomicrobiales Reads	MEGAN nt Methanomicrobiales (%)	MEGAN nt Methanosarcinales Reads	MEGAN nt Methanosardinales (%)	MEGAN Refseq Assigned Reads	MEGAN Refseq Assigned (%)	MEGAN Refseq Eukaryota Reads	MEGAN Refseq Eukaryota (%)	MEGAN Refseq Bacteria Reads	MEGAN Refseq Bacteria (%)	MEGAN Refseq Archaea Reads	MEGAN Refseq Archaea (%)	MEGAN Refseq Viridiplantae Reads	MEGAN Refseq Viridiplantae (%)	MEGAN Refseq Metazoa Reads	MEGAN Refseq Metazoa (%)	MEGAN Refseq Rhizobiales Reads	MEGAN Refseq Rhizobiales (%)
BWINDI-1	DNA-MUB17-2D-1L-SAMPLE1	CORE: 2D-1L, Depth: 3-5cm	07-Aug-2017	4.53659	249	108	43.3735	173	56	0.00649351	0.00478326	2870007	1706304	177365	0.103947	3781	0.0213176	169051	0.953125	967	0.00545203	741	0.00417783	1409	0.00794407	40273	0.227063	17416	0.098193	116	0.000654019	0	0	271	0.00152792	268386	0.157291	3040	0.011327	260888	0.972063	1316	0.00490339	518	0.00193006	1779	0.00662851	51359	0.191362
BWINDI-2	DNA-MUB17-2D-1L-SAMPLE2	CORE: 2D-1L, Depth: 5-7cm	07-Aug-2017	6.80488	253	92.8	36.6798	169	57	0.0079875	0.00765262	5422536	3212120	304634	0.0948389	6918	0.0227092	289080	0.948942	2366	0.0077667	1509	0.00495349	2695	0.00884668	67637	0.222027	32196	0.105687	261	0.000856766	297	0.00097494	804	0.00263923	457533	0.14244	6381	0.0139465	442273	0.966647	2901	0.00634053	1245	0.00272112	3872	0.00846278	84781	0.1853
BWINDI-4	DNA-MUB17-2D-1L-SAMPLE4	CORE: 2D-1L, Depth: 9-11cm	07-Aug-2017	11.3415	257	88.5	34.4358	168	58	0.00819859	0.00973622	5882409	3590642	294734	0.0820839	8475	0.0287547	276976	0.939749	2931	0.00994456	2306	0.007824	3106	0.0105383	52514	0.178174	29470	0.0999885	368	0.00124858	660	0.00223931	714	0.00242252	446550	0.124365	9034	0.0202307	427598	0.957559	3393	0.00759825	2129	0.00476766	5345	0.0119695	66483	0.148881
BWINDI-7	DNA-MUB17-2D-1L-SAMPLE7	CORE: 2D-1L, Depth: 15-17cm	07-Aug-2017	18.1463	257	77.5	30.1556	175	52	0.00501253	0.00268817	433482	195672	13818	0.0706182	468	0.0338689	12853	0.930164	182	0.0131712	125	0.00904617	176	0.012737	2203	0.15943	1270	0.0919091	24	0.00173686	38	0.00275004	32	0.00231582	21457	0.109658	573	0.0267046	20312	0.946637	206	0.0096006	127	0.00591881	373	0.0173836	2889	0.134641
BWINDI-9	DNA-MUB17-2D-1L-SAMPLE9	CORE: 2D-1L, Depth: 19-21cm	07-Aug-2017	22.6829	253	72.6	28.6957	168	57	0.0122752	0.0108077	3238557	2003518	140961	0.0703567	4774	0.0338675	130613	0.92659	2100	0.0148977	1197	0.00849171	1924	0.0136492	20751	0.147211	11793	0.0836614	389	0.00275963	405	0.00287314	370	0.00262484	217667	0.108642	5447	0.0250245	205952	0.946179	2556	0.0117427	1230	0.00565083	3388	0.0155651	27221	0.125058
BWINDI-12	DNA-MUB17-2D-1L-SAMPLE12	CORE: 2D-1L, Depth: 30-32cm	07-Aug-2017	35.1585	246	43.1	17.5203	155	59	0.0192403	0.0167653	3352323	2216156	117657	0.0530906	5108	0.0434143	105319	0.895136	3842	0.0326542	1566	0.0133099	1837	0.0156132	12912	0.109743	7010	0.05958	1259	0.0107006	681	0.00578801	640	0.00543954	184707	0.0833457	6491	0.0351421	169695	0.918725	4753	0.0257326	1552	0.0084025	4048	0.0219158	18714	0.101317
BWINDI-14	DNA-MUB17-2D-1L-SAMPLE14	CORE: 2D-1L, Depth: 40-42cm	07-Aug-2017	46.5	245	42.9	17.5102	155	58	0.0100503	0.0234742	333222	222421	12099	0.0543968	530	0.0438053	10841	0.896024	430	0.0355401	171	0.0141334	188	0.0155385	1322	0.109265	721	0.0595917	136	0.0112406	66	0.005455	74	0.00611621	18825	0.0846368	685	0.0363878	17289	0.918406	515	0.0273572	175	0.00929615	368	0.0195485	1920	0.101992
BWINDI-16	DNA-MUB17-2D-1L-SAMPLE16	CORE: 2D-1L, Depth: 50-52cm	07-Aug-2017	57.8415	251	39.4	15.6972	152	56	0.0316073	0.0238095	1774013	1203502	68602	0.057002	2677	0.0390222	59250	0.863677	4819	0.0702458	705	0.0102767	1076	0.0156847	11468	0.167167	3841	0.0559896	2926	0.0426518	524	0.00763826	505	0.0073613	106933	0.0888515	3659	0.0342177	93890	0.878026	7336	0.0686037	732	0.00684541	2396	0.0224066	16812	0.15722
BWINDI-17	DNA-MUB17-2D-1L-SAMPLE17	CORE: 2D-1L, Depth: 60-62cm	07-Aug-2017	69.1829	255	21.6	8.47059	148	58	0.023699	0.0202487	8119034	5446509	295724	0.0542961	11982	0.0405175	260048	0.87936	15450	0.0522447	3085	0.010432	4875	0.016485	44560	0.150681	20887	0.07063	7817	0.0264334	1914	0.00647225	1711	0.0057858	460847	0.0846133	16884	0.0366369	411996	0.893997	23021	0.0499537	3261	0.0070761	11325	0.0245743	65228	0.141539
BWINDI-18	DNA-MUB17-2D-1L-SAMPLE18	CORE: 2D-1L, Depth: 70-72cm	07-Aug-2017	80.5244	245	30.3	12.3673	145	59	0.0243389	0.0293761	5240391	3550517	174036	0.0490171	7416	0.0426119	152162	0.874313	9253	0.0531672	1855	0.0106587	2984	0.0171459	23622	0.135731	11467	0.0658887	3812	0.0219035	1577	0.00906134	992	0.00569997	272161	0.0766539	10968	0.0402997	242578	0.891303	13208	0.0485301	2095	0.00769765	7376	0.0271016	34873	0.128134
BWINDI-19	DNA-MUB17-2D-1L-SAMPLE19	CORE: 2D-1L, Depth: 78-80cm	07-Aug-2017	89.5976	242	29.4	12.1488	149	58	0.0242038	0.0195091	3224088	2163466	95367	0.0440807	4861	0.0509715	82407	0.864104	4927	0.0516636	1343	0.0140824	1904	0.019965	10444	0.109514	5035	0.052796	1389	0.0145648	1170	0.0122684	473	0.00495979	150863	0.0697321	6862	0.045485	134175	0.889383	6445	0.0427209	1385	0.00918051	4557	0.0302062	15460	0.102477
BWINDI-20	DNA-MUB17-2C-2L-SAMPLE20	CORE: 2C-2L, Depth: 3-5cm	07-Aug-2017	104.503	244	17.3	7.09016	149	57	0.0167715	0.0446809	2018771	1386579	61441	0.0443112	3133	0.050992	53096	0.864179	3236	0.0526684	856	0.0139321	1248	0.0203122	5844	0.0951156	3898	0.063443	1103	0.0179522	693	0.0112791	316	0.00514315	97378	0.070229	4597	0.0472078	86137	0.884563	4479	0.045996	865	0.00888291	3146	0.0323071	8969	0.092105
BWINDI-22	DNA-MUB17-2C-2L-SAMPLE22	CORE: 2C-2L, Depth: 23-25cm	07-Aug-2017	127.016	257	25.2	9.80545	138	60	0.0203046	0.027027	418564	283968	12038	0.0423921	551	0.0457717	10466	0.869414	639	0.0530819	142	0.011796	218	0.0181093	1572	0.130586	626	0.052002	197	0.0163648	197	0.0163648	61	0.00506729	19011	0.0669477	787	0.0413971	16970	0.892641	831	0.0437115	139	0.00731156	545	0.0286676	2338	0.122981
BWINDI-24	DNA-MUB17-2C-2L-SAMPLE24	CORE: 2C-2L, Depth: 43-45cm	07-Aug-2017	149.53	249	20.7	8.31325	145	58	0.0290002	0.0307564	24239573	15458842	657856	0.0425553	30927	0.0470118	575511	0.874828	29939	0.04551	7225	0.0109826	12877	0.0195742	94290	0.143329	35340	0.05372	8861	0.0134695	8861	0.0134695	3165	0.00481108	1053091	0.0681222	46684	0.0443305	944698	0.897072	37928	0.0360159	7842	0.00744665	32545	0.0309043	146804	0.139403
BWINDI-26	DNA-MUB17-2C-2L-SAMPLE26	CORE: 2C-2L, Depth: 73-75cm	07-Aug-2017	183.301	257	15.1	5.87549	136	56	0.0403752	0.0375985	21760764	14329899	579812	0.0404617	29179	0.0503249	503515	0.868411	28285	0.0487831	7367	0.0127058	11912	0.0205446	107537	0.185469	26949	0.0464789	9246	0.0159465	9246	0.0159465	2932	0.00505681	926896	0.0646827	47672	0.0514319	825181	0.890263	33680	0.0363363	8955	0.00966128	32469	0.0350298	165904	0.178989
BWINDI-28	DNA-MUB17-2C-3L-SAMPLE28	CORE: 2C-3L, Depth: 3-5cm	07-Aug-2017	204.255	255	15.2	5.96078	136	57	0.0428603	0.0367175	7379308	4783048	195766	0.0409291	9079	0.0463768	170015	0.86846	10254	0.0523789	2186	0.0111664	3787	0.0193445	36151	0.184664	9442	0.0482311	3575	0.0182616	3575	0.0182616	889	0.00454114	312345	0.0653025	13754	0.0440346	279108	0.893589	12485	0.0399718	2325	0.00744369	9602	0.0307416	56079	0.179542
BWINDI-30	DNA-MUB17-2C-3L-SAMPLE30	CORE: 2C-3L, Depth: 43-45cm	07-Aug-2017	246.809	248	14.0	5.64516	133	56	0.0400851	0.038332	14473896	9683674	356803	0.0368458	18534	0.0519446	306797	0.85985	19030	0.0533348	4470	0.0125279	7799	0.021858	47709	0.133712	17547	0.0491784	5851	0.0163984	5851	0.0163984	1473	0.00412833	580032	0.0598979	29963	0.0516575	513818	0.885844	22191	0.0382582	5145	0.0088702	20677	0.035648	74254	0.128017
BWINDI-32	DNA-MUB17-2C-3L-SAMPLE32	CORE: 2C-3L, Depth: 83-85cm	07-Aug-2017	289.362	252	8.69	3.44841	132	55	0.0392157	0.0721649	541513	389672	12571	0.0322605	874	0.0695251	10388	0.826346	836	0.0665023	185	0.0147164	358	0.0284782	1547	0.123061	635	0.0505131	317	0.0252168	317	0.0252168	64	0.00509108	20492	0.0525878	1462	0.0713449	17464	0.852235	1014	0.0494827	275	0.0134199	990	0.0483115	2401	0.117168
BWINDI-33	DNA-MUB17-2C-4L-SAMPLE33	CORE: 2C-4L, Depth: 4-6cm	07-Aug-2017	305.108	256	7.44	2.90625	131	55	0.0170732	0.0359712	1250378	874602	30279	0.0346203	2049	0.0676707	25546	0.843687	1638	0.0540969	606	0.0200139	783	0.0258595	2784	0.0919449	1756	0.057994	520	0.0171736	520	0.0171736	159	0.00525116	48651	0.0556264	3564	0.0732565	42077	0.864874	1865	0.0383343	800	0.0164436	2370	0.0487143	4361	0.0896384
BWINDI-35	DNA-MUB17-2C-4L-SAMPLE35	CORE: 2C-4L, Depth: 44-46cm	07-Aug-2017	345.968	254	11.5	4.52756	151	56	0.0328698	0.0310263	859566	584064	32930	0.0563808	1531	0.0464926	29298	0.889705	1235	0.0375038	592	0.0179775	526	0.0159733	5414	0.164409	2602	0.0790161	224	0.00680231	224	0.00680231	298	0.0090495	50195	0.0859409	2460	0.0490089	45286	0.902201	1517	0.0302221	785	0.015639	1431	0.0285088	7763	0.154657
BWINDI-37	DNA-MUB17-2C-4L-SAMPLE37	CORE: 2C-4L, Depth: 84-86cm	07-Aug-2017	386.828	258	6.75	2.61628	133	54	0.0529061	0.0524372	2194255	1593996	58256	0.0365471	3787	0.0650062	49688	0.852925	3135	0.0538142	1308	0.0224526	1396	0.0239632	11015	0.189079	2679	0.0459867	926	0.0158954	926	0.0158954	291	0.00499519	92274	0.0578885	6498	0.0704207	80229	0.869465	3575	0.0387433	1686	0.0182717	4122	0.0446713	16333	0.177005
BWINDI-38	DNA-MUB17-2C-5L-SAMPLE38	CORE: 2C-5L, Depth: 5-7cm	07-Aug-2017	405.698	261	9.66	3.70115	128	52	0.0384615	0.0391459	963762	702049	24421	0.0347853	1606	0.0657631	20733	0.848982	1297	0.05311	517	0.0211703	590	0.0241595	4031	0.165063	1168	0.0478277	390	0.0159699	390	0.0159699	118	0.00483191	38887	0.0553907	2665	0.0685319	33865	0.870857	1492	0.0383676	615	0.0158151	1718	0.0441793	6037	0.155245
BWINDI-40	DNA-MUB17-2C-5L-SAMPLE40	CORE: 2C-5L, Depth: 45-47cm	07-Aug-2017	451.279	254	7.26	2.85827	134	54	0.0394737	0.0428571	492185	351250	9558	0.0272114	1102	0.115296	7550	0.789914	538	0.0562879	558	0.0583804	300	0.0313873	1327	0.138837	405	0.0423729	139	0.0145428	139	0.0145428	75	0.00784683	15826	0.0450562	2176	0.137495	12579	0.794831	657	0.041514	1087	0.0686844	921	0.0581954	2115	0.133641
BWINDI-42	DNA-MUB17-2C-5L-SAMPLE42	CORE: 2C-5L, Depth: 83-85cm	07-Aug-2017	494.581	251	4.82	1.92032	127	50	0.044898	0.0740741	338427	250895	8688	0.034628	523	0.060198	7415	0.853476	468	0.0538674	166	0.0191068	196	0.0225599	2006	0.230893	417	0.0479972	111	0.0127762	111	0.0127762	62	0.00713628	13990	0.0557604	905	0.0646891	12225	0.873838	571	0.0408149	214	0.0152966	584	0.0417441	3197	0.22852
BWINDI-43	DNA-MUB17-2C-6L-SAMPLE43	CORE: 2C-6L, Depth: 2-4cm	07-Aug-2017	505.319	253	5.50	2.17391	141	55	0.0413534	0.0465587	2207643	1613924	48185	0.0298558	4071	0.0844869	38954	0.808426	3528	0.0732178	1471	0.0305282	1491	0.0309432	8304	0.172336	2353	0.0488326	878	0.0182214	878	0.0182214	391	0.00811456	76371	0.0447581	6919	0.0905972	63323	0.82915	4298	0.0562779	2071	0.0271176	4154	0.0543924	12859	0.168375
BWINDI-45	DNA-MUB17-2C-6L-SAMPLE45	CORE: 2C-6L, Depth: 42-44cm	07-Aug-2017	547.872	249	10.3	4.13655	133	54	0.0471092	0.0480769	1571132	1151491	35185	0.030556	3121	0.0887026	28565	0.811852	2329	0.066193	1321	0.0375444	997	0.0283359	7541	0.214324	1382	0.0392781	456	0.0129601	456	0.0129601	221	0.00628109	56890	0.0494055	5637	0.099086	47062	0.827246	2870	0.0504482	2292	0.0402883	2731	0.0480049	11532	0.202707
BWINDI-47	DNA-MUB17-2C-6L-SAMPLE47	CORE: 2C-6L, Depth: 82-84cm	07-Aug-2017	590.426	253	13.2	5.21739	139	55	0.0496689	0.0354331	393546	284584	9583	0.0336737	713	0.0744026	8003	0.835125	548	0.0571846	278	0.0290097	231	0.0241052	2144	0.22373	365	0.0380883	75	0.00782636	75	0.00782636	48	0.00500887	15398	0.054107	1199	0.0778673	12961	0.841733	865	0.0561761	489	0.0317574	579	0.0376023	3116	0.202364
BWINDI-48	DNA-MUB17-2C-7L-SAMPLE48	CORE: 2C-7L, Depth: 3-5cm	07-Aug-2017	604.073	255	8.68	3.40392	133	55	0.0604027	0.0869565	222052	164509	4846	0.0294574	397	0.0819232	3984	0.822121	282	0.0581923	155	0.0319851	138	0.0284771	1027	0.211927	189	0.0390012	36	0.00742881	36	0.00742881	21	0.00433347	8055	0.0489639	675	0.0837989	6712	0.833271	480	0.0595903	266	0.033023	330	0.0409683	1516	0.188206
BWINDI-50	DNA-MUB17-2C-7L-SAMPLE50	CORE: 2C-7L, Depth: 43-45cm	07-Aug-2017	644.8	248	2.26	0.91129	139	55	0.0580357	0.0530973	399966	280275	12673	0.0452163	702	0.0553934	11163	0.880849	484	0.0381914	297	0.0234357	252	0.0198848	1510	0.119151	1200	0.0946895	67	0.00528683	67	0.00528683	61	0.00481338	19540	0.0697172	1063	0.0544012	17253	0.882958	883	0.0451894	370	0.0189355	586	0.0299898	2227	0.113971
BWINDI-51	DNA-MUB17-4A-1L-SAMPLE51	CORE: 4A-1L, Depth: 0-2cm	07-Aug-2017	1.16084	257	136	52.9183	151	60	0.01002	0.00578035	278271	186888	14288	0.0764522	478	0.0334546	13164	0.921333	340	0.0237962	112	0.00783875	188	0.0131579	3030	0.212066	1371	0.0959546	94	0.00657895	94	0.00657895	162	0.0113382	22091	0.118204	558	0.0252592	20821	0.942511	393	0.0177901	125	0.00565841	336	0.0152098	3858	0.174641
BWINDI-52	DNA-MUB17-4A-1L-SAMPLE52	CORE: 4A-1L, Depth: 5-7cm	07-Aug-2017	6.96503	253	118	46.6403	143	59	0.0110803	0.0111732	272759	188904	11796	0.0624444	374	0.0317057	10805	0.915988	323	0.0273822	101	0.00856222	129	0.0109359	1904	0.161411	952	0.0807053	55	0.0046626	55	0.0046626	169	0.0143269	18398	0.0973934	479	0.0260354	17203	0.935047	377	0.0204914	117	0.00635939	290	0.0157626	2544	0.138276
BWINDI-53	DNA-MUB17-4A-1L-SAMPLE53	CORE: 4A-1L, Depth: 10-12cm	07-Aug-2017	12.7692	256	87.7	34.2578	140	59	0.0119949	0.00769724	1792257	1223115	65863	0.0538486	2649	0.0402199	59436	0.902419	1993	0.0302598	778	0.0118124	942	0.0143024	9390	0.142569	4927	0.0748068	392	0.00595175	392	0.00595175	933	0.0141658	103584	0.0846887	3474	0.033538	95608	0.923	2486	0.0239998	981	0.00947057	2001	0.0193177	12862	0.12417
BWINDI-54	DNA-MUB17-4A-1L-SAMPLE54	CORE: 4A-1L, Depth: 20-22cm	07-Aug-2017	24.3776	248	23.7	9.55645	147	60	0.04	0.04	16268	11116	846	0.0761065	27	0.0319149	771	0.911348	34	0.0401891	7	0.00827423	12	0.0141844	188	0.222222	76	0.0898345	28	0.0330969	1	0.00118203	28	0.0330969	1302	0.117128	29	0.0222734	1221	0.937788	38	0.0291859	10	0.00768049	17	0.0130568	239	0.183564
BWINDI-56	DNA-MUB17-4A-1L-SAMPLE56	CORE: 4A-1L, Depth: 60-62cm	07-Aug-2017	70.8112	256	17.8	6.95312	150	58	0	0	6331	4206	195	0.0463623	5	0.025641	178	0.912821	6	0.0307692	3	0.0153846	1	0.00512821	35	0.179487	10	0.0512821	2	0.0102564	2	0.0102564	0	0	322	0.0765573	9	0.0279503	296	0.919255	9	0.0279503	2	0.00621118	7	0.0217391	52	0.161491
BWINDI-57	DNA-MUB17-5A-1L-SAMPLE57	CORE: 5A-1L, Depth: 0-2cm	07-Aug-2017	1.18797	252	72.1	28.6111	162	58	0	0	732	452	32	0.0707965	1	0.03125	31	0.96875	0	0	1	0.03125	0	0	10	0.3125	3	0.09375	0	0	0	0	0	0	51	0.112832	2	0.0392157	48	0.941176	0	0	2	0.0392157	0	0	17	0.333333
BWINDI-58	DNA-MUB17-5A-1L-SAMPLE58	CORE: 5A-1L, Depth: 5-7cm	07-Aug-2017	7.12782	253	138	54.5455	149	60	0	0	56146	37261	2409	0.064652	78	0.0323786	2177	0.903694	96	0.0398506	22	0.00913242	30	0.0124533	317	0.13159	201	0.0834371	23	0.00954753	23	0.00954753	48	0.0199253	3661	0.0982529	97	0.0264955	3387	0.925157	116	0.0316853	21	0.00573614	68	0.0185742	422	0.115269
BWINDI-59	DNA-MUB17-5A-1L-SAMPLE59	CORE: 5A-1L, Depth: 10-12cm	07-Aug-2017	13.0677	254	140	55.1181	158	60	0	0	784	500	27	0.054	0	0	24	0.888889	2	0.0740741	0	0	0	0	6	0.222222	0	0	0	0	2	0.0740741	0	0	48	0.096	0	0	45	0.9375	3	0.0625	0	0	0	0	14	0.291667
BWINDI-60	DNA-MUB17-5A-1L-SAMPLE60	CORE: 5A-1L, Depth: 20-22cm	07-Aug-2017	24.9474	252	95.3	37.8175	154	60	0	0	3756	2473	175	0.0707643	5	0.0285714	152	0.868571	12	0.0685714	0	0	3	0.0171429	26	0.148571	15	0.0857143	1	0.00571429	1	0.00571429	10	0.0571429	268	0.10837	7	0.0261194	245	0.914179	11	0.0410448	1	0.00373134	4	0.0149254	45	0.16791
BWINDI-62	DNA-MUB17-5A-1L-SAMPLE62	CORE: 5A-1L, Depth: 60-62cm	07-Aug-2017	72.4662	249	51.4	20.6426	140	61	0	0.0384615	33565	23184	1615	0.0696601	45	0.0278638	1448	0.896594	76	0.0470588	13	0.00804954	11	0.00681115	290	0.179567	134	0.0829721	5	0.00309598	5	0.00309598	53	0.0328173	2441	0.105288	55	0.0225317	2256	0.924211	87	0.0356411	14	0.00573535	33	0.013519	369	0.151168
BWINDI-63	DNA-MUB17-1E-1L-SAMPLE63	CORE: 1E-1L, Depth: 0-2cm	06-Aug-2017	1.18	251	216	86.0558	163	57	0	0	7600	4692	501	0.106777	15	0.0299401	455	0.908184	21	0.0419162	4	0.00798403	6	0.011976	59	0.117764	75	0.149701	1	0.00199601	1	0.00199601	18	0.0359281	757	0.161338	9	0.011889	716	0.945839	20	0.0264201	5	0.00660502	3	0.00396301	93	0.122853
BWINDI-70	DNA-MUB17-2C-1L-SAMPLE70	CORE: 2C-1L, Depth: 0-2cm	07-Aug-2017	1.12	254	138	54.3307	160	57	0	0	193	126	14	0.111111	0	0	13	0.928571	1	0.0714286	0	0	0	0	1	0.0714286	2	0.142857	0	0	0	0	0	0	18	0.142857	0	0	17	0.944444	1	0.0555556	0	0	0	0	2	0.111111
BWINDI-75	DNA-MUB17-1A-1L-SAMPLE75	CORE: 1A-1L, Depth: 0-2cm	05-Aug-2017	1.19	253	123	48.6166	172	58	0.00318218	0.00686499	681308	328141	42213	0.128643	924	0.021889	40157	0.951295	355	0.00840973	243	0.00575652	311	0.0073674	7129	0.168882	5120	0.12129	16	0.00037903	0	0	242	0.00573283	63031	0.192085	821	0.0130253	61158	0.970284	415	0.00658406	222	0.00352208	411	0.0065206	9024	0.143168
BWINDI-97	DNA-MUB17-2A-1L-SAMPLE97	CORE: 2A-1L, Depth: 0-2cm	06-Aug-2017	1.03	248	118	47.5806	160	59	0.00378788	0.0018797	219279	138330	14174	0.102465	341	0.0240581	13436	0.947933	105	0.00740793	73	0.00515028	108	0.00761959	3106	0.219134	1350	0.0952448	6	0.00042331	6	0.00042331	18	0.00126993	21641	0.156445	281	0.0129846	20961	0.968578	157	0.00725475	42	0.00194076	149	0.00688508	3979	0.183864
BWINDI-100	DNA-MUB17-2D-1L-SAMPLE100	CORE: 2D-1L, Depth: 0-2cm	07-Aug-2017	1.13	258	141	54.6512	159	58	0	0	973	620	63	0.101613	2	0.031746	61	0.968254	0	0	0	0	0	0	8	0.126984	7	0.111111	0	0	0	0	0	0	98	0.158065	1	0.0102041	97	0.989796	0	0	0	0	1	0.0102041	12	0.122449
BWINDI-B1	DNA-MUB17-ExtractionBlank1	laboratory reagents blank extraction 1	22-Feb-2018		0	<0.50		144	71	0	0	46643	30	6	0.2	2	0.333333	4	0.666667	0	0	0	0	2	0.333333	0	0	0	0	0	0	0	0	0	0	12	0.4	4	0.333333	7	0.583333	0	0	0	0	4	0.333333	0	0
BWINDI-B2	DNA-MUB17-ExtractionBlank2	laboratory reagents blank extraction 2	28-Feb-2018		0	<0.50				0	0	1	0
BWINDI-C1	DNA-MUB17-SoapBlank1	lubrication soap blank 1	05-Aug-2017		255	<0.50		87	44	0	0	10998	17	1	0.0588235	0	0	1	1	0	0	0	0	0	0	0	0	0	0	0	0	0	0	0	0	3	0.176471	1	0.333333	2	0.666667	0	0	0	0	1	0.333333	0	0
BWINDI-C2	DNA-MUB17-SoapBlank2	lubrication soap blank 2	05-Aug-2017		280	<0.50		130	59	0	0	11568	23	11	0.478261	10	0.909091	1	0.0909091	0	0	0	0	10	0.909091	0	0	1	0.0909091	0	0	0	0	0	0	14	0.608696	10	0.714286	3	0.214286	0	0	0	0	10	0.714286	0	0
BWINDI-LB1	DNA-MUB17-LibraryBlank1	DNA library blank 1	09-May-2018							0	0	2	0
BWINDI-LB2	DNA-MUB17-LibraryBlank2	DNA library blank 2	09-May-2018					96	60	0	0	26065	76	17	0.223684	7	0.411765	10	0.588235	0	0	0	0	7	0.411765	0	0	0	0	0	0	0	0	0	0	29	0.381579	12	0.413793	17	0.586207	0	0	0	0	12	0.413793	2	0.0689655
BWINDI-LB3	DNA-MUB17-LibraryBlank3	DNA library blank 3	09-May-2018							0	0	6137	0
BWINDI-LB4	DNA-MUB17-LibraryBlank4	DNA library blank 4	09-May-2018					87	66	0	0	14108	5	2	0.4	1	0.5	1	0.5	0	0	0	0	1	0.5	0	0	0	0	0	0	0	0	0	0	4	0.8	1	0.25	3	0.75	0	0	0	0	1	0.25	0	0
[truncated: 15 more columns]
